# Supplementary material
Source: Springer Nature journal article supplement (https://www.springermedizin.de/resource/supplementary/13256_2011_2048_MOESM6_ESM.pdf/9649070)

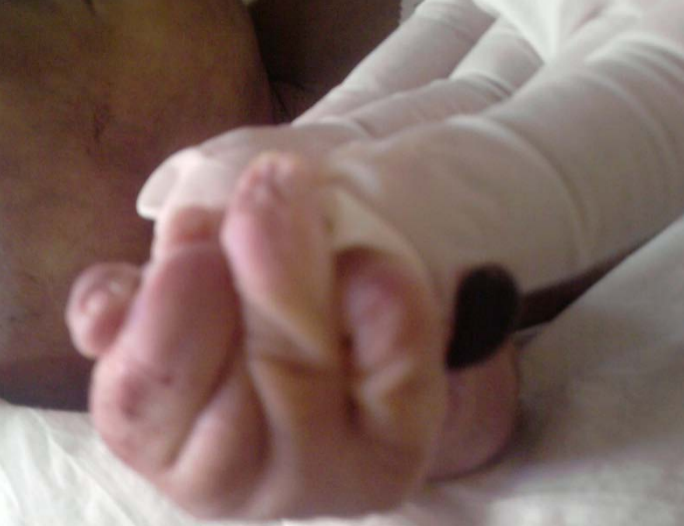

Supplement: MOESM6 [file 9649070]
